# The American Journal of Psychiatry

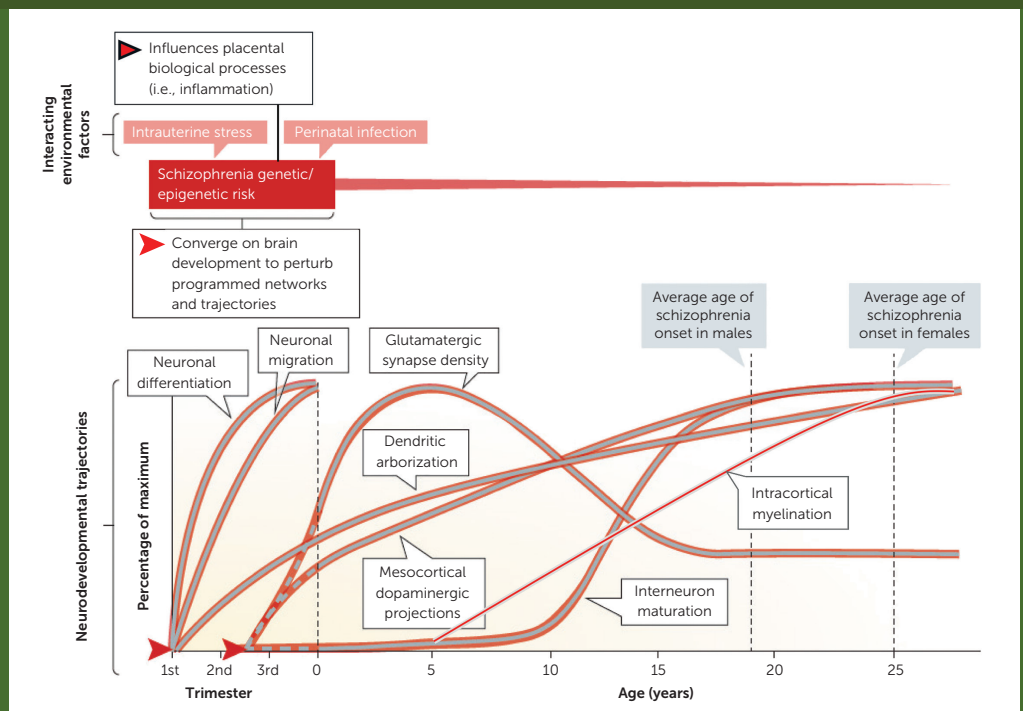

The Genesis of Schizophrenia: An Origin Story

Neuromelanin-Sensitive MRI as Candidate Marker for Treatment Resistance in First-Episode Schizophrenia

Long-Term Course of Remission and Recovery in Psychotic Disorders

Subcortico-Cortical Dysconnectivity in ADHD: A Voxel-Wise Mega-Analysis Across Multiple Cohorts
